# Supplementary material
Source: publisher site journal article supplement (https://www.dovepress.com/get_supplementary_file.php?f=384589.xlsx)
Supplement: Supplementary file 1 [file get_supplementary_file.php]

## Sheet: Sheet1
Table S1. Clinical metadata of the ST1 Listeria monocytogenes isolates retrieved from NCBI GenBank database.
Strain	ST	serogroup	Collection Date	Country of Isolation	City of Isolation
FSIS1606618	1	IVb	2016	USA	IA
F2-382	1	IVb	-	-	-
02-1792	1	IVb	2002	Canada	British Columbia
2013L-5504	1	IVb	-	-	-
15KSM	1	IVb	2013	Austria	-
18	1	IVb	-	Poland	-
2842STDY5753856	1	IVb	2006	Netherlands	-
18ZQLM06	1	IVb	2018-5-12	China	Zhaoqing
2015TE32263	1	IVb	2015-11-3	Italy	Marche, Pesaro- Urbino, Pesaro
2842STDY5753857	1	IVb	2006	Netherlands	-
2842STDY5753863	1	IVb	2006	Netherlands	-
2842STDY5753864	1	IVb	2006	Netherlands	-
2842STDY5753909	1	IVb	2006	Netherlands	-
2842STDY5753910	1	IVb	2006	Netherlands	-
2842STDY5753936	1	IVb	2006	Netherlands	-
18ZQLM05	1	IVb	2018-5-12	China	Zhaoqing
2842STDY5753975	1	IVb	2006	Netherlands	-
741	1	IVb	2017	Poland	-
2842STDY5753960	1	IVb	2006	Netherlands	-
81-0558	1	IVb	1981-6-1	Canada	Halifax
2842STDY5753974	1	IVb	2006	Netherlands	-
81-0861	1	IVb	1981	Canada	-
2842STDY5753976	1	IVb	2006	Netherlands	-
2842STDY5753977	1	IVb	2006	Netherlands	-
944	1	IVb	Mar 2013	Ireland	-
A5	1	IVb	1990-8-2	Canada	Alberta
BCW_2371	1	IVb	-	-	-
BCW_2381	1	IVb	-	-	-
BCW_2388	1	IVb	-	-	-
BCW_2390	1	IVb	-	-	-
BCW_2416	1	IVb	-	-	-
BCW_2417	1	IVb	-	-	-
BCW_3927	1	IVb	-	-	-
BCW_3943	1	IVb	-	-	-
BCW_4299	1	IVb	-	-	-
BCW_4777	1	IVb	-	-	-
BCW_4780	1	IVb	-	-	-
FJUV00000000	1	IVb	-	-	-
CFSAN002250	1	IVb	-	-	-
CFSAN002257	1	IVb	-	-	-
CFSAN002284	1	IVb	-	-	-
CFSAN002298	1	IVb	-	-	-
CFSAN026590	1	IVb	2014-6-13	USA	NC
CFSAN026591	1	IVb	2014-6-13	USA	NC
CFSAN026592	1	IVb	2014-6-13	USA	NC
CFSAN026593	1	IVb	2014-6-13	USA	NC
CFSAN026594	1	IVb	2014-6-13	USA	NC
CFSAN028822	1	IVb	2012-6-20	USA	GA
CFSAN028896	1	IVb	2012-7-7	USA	MD
CFSAN028898	1	IVb	2012-7-7	USA	MD
CFSAN028900	1	IVb	2012-7-7	USA	MD
CFSAN028902	1	IVb	2012-7-7	USA	MD
CFSAN035167	1	IVb	2010	Chile	Santiago
CFSAN035168	1	IVb	2011	Chile	Araucana
CFSAN035169	1	IVb	2011	Chile	Santiago
CFSAN035170	1	IVb	2011	Chile	Ohiggins
CFSAN035182	1	IVb	2011	Chile	Valparaiso
CFSAN035183	1	IVb	2008	Chile	Santiago
CFSAN035184	1	IVb	2008	Chile	Ohiggins
CFSAN035185	1	IVb	2010	Chile	Santiago
CFSAN035188	1	IVb	2008	Chile	Bio-Bio
CFSAN035191	1	IVb	2010	Chile	Ohiggins
CFSAN035193	1	IVb	2010	Chile	Araucana
CFSAN035201	1	IVb	2011	Chile	Bio-Bio
CFSAN035202	1	IVb	2009	Chile	Santiago
CFSAN035203	1	IVb	2010	Chile	Santiago
CFSAN044774	1	IVb	2003	Italy	-
CFSAN044793	1	IVb	2004	Italy	-
CFSAN044795	1	IVb	2004	Italy	-
CFSAN044801	1	IVb	2004	Italy	-
CFSAN045851	1	IVb	Feb 2014	Italy	-
FDA1077798-014-008	1	IVb	2018	USA	CA
CFSAN045924	1	IVb	Mar 2014	Italy	-
CFSAN045925	1	IVb	Apr 2014	Italy	-
CFSAN046016	1	IVb	Jan 2011	Italy	-
CFSAN046032	1	IVb	Jun 2011	Italy	-
CFSAN046092	1	IVb	2012	Italy	-
CFSAN046093	1	IVb	2012	Italy	-
CFSAN046094	1	IVb	2012	Italy	-
CFSAN049227	1	IVb	2005	Italy	-
CFSAN049240	1	IVb	2014	Italy	-
CFSAN049243	1	IVb	2013	Italy	-
CFSAN049245	1	IVb	2014	Italy	-
CFSAN049248	1	IVb	2015	Italy	-
CFSAN049252	1	IVb	2014	Italy	-
CFSAN049258	1	IVb	2015	Italy	-
CFSAN049264	1	IVb	2016	Italy	-
CFSAN049265	1	IVb	2015	Italy	-
CFSAN049275	1	IVb	2013	Italy	-
CFSAN049297	1	IVb	2014	Italy	-
CFSAN049303	1	IVb	2014	Italy	-
CFSAN049307	1	IVb	2014	Italy	-
CFSAN049305	1	IVb	2014	Italy	-
CFSAN049312	1	IVb	2014	Italy	-
CFSAN049318	1	IVb	2014	Italy	-
CFSAN049319	1	IVb	2016	Italy	-
FBUNT	1	IVb	1996	Argentina	San Luis
F2365	1	IVb	-	-	-
FDA00008712	1	IVb	2015-1-6	USA	MO
FDA00008714	1	IVb	2015-1-6	USA	MO
FDA00008715	1	IVb	2015-1-6	USA	MO
FDA00008730	1	IVb	2015-1-13	USA	NE
FDA1077798-053-001	1	IVb	2018	USA	CA
FDA1077798-086-002	1	IVb	2018	USA	CA
FLAG-41283-B	1	IVb	2018-6-5	USA	FL
LM-F-101	1	IVb	2010	Canada	Toronto
FSLS4-0270	1	IVb	2001	USA	NY
FUJR00000000	1	IVb	-	-	-
FUJY00000000	1	IVb	-	-	-
FUKC00000000	1	IVb	-	-	-
J2213	1	IVb	2003	USA	Arizona
J2933	1	IVb	-	USA	-
J3552	1	IVb	-	USA	-
J4600	1	IVb	2007-6-27	USA	Oklahoma
J4791	1	IVb	2007	USA	SD
L174	1	IVb	2020	Switzerland	Zurich
L2113	1	IVb	Jul 2015	-	-
L28	1	IVb	2020	Switzerland	Zurich
L42	1	IVb	2020	Switzerland	Zurich
L970	1	IVb	Mar 2013	-	-
LL195	1	IVb	-	-	-
LM-F-137	1	IVb	2012	Canada	Toronto
LM-F-37	1	IVb	2010	Canada	Toronto
LM05-00172	1	IVb	-	-	-
LM07-00596	1	IVb	-	-	-
Lm224	1	IVb	2011	Switzerland	-
Lm225	1	IVb	2011	Switzerland	-
LM259	1	IVb	Sep 2015	-	-
Lm69	1	IVb	2009	Canada	British Columbia
Lm77	1	IVb	2009	Canada	British Columbia
Lm88	1	IVb	2009	Canada	British Columbia
Lmo5148	1	IVb	2017-12-11	China	Zhejiang
MOD1_LS41	1	IVb	-	-	-
MOD1_LS50	1	IVb	-	-	-
NCTC11994	1	IVb	-	-	-
MQ130029	1	IVb	2013	Ireland	-
MQ130032	1	IVb	2013	Ireland	-
MQ130042	1	IVb	2013	Ireland	-
MQ140025	1	IVb	2014	Ireland	-
MQ140031	1	IVb	2014	Ireland	-
MQ140033	1	IVb	2014	Ireland	-
NE dc2014	1	IVb	-	-	-
N13-1079	1	IVb	2013-7-10	Switzerland	-
N11-2292	1	IVb	2011-7-19	Switzerland	-
N11-2747	1	IVb	2011-7-24	Switzerland	-
N12-1730	1	IVb	2012-9-6	Switzerland	-
NRRL B-33582	1	IVb	2001-8-14	USA	MD
N12-1996	1	IVb	2012-10-9	Switzerland	-
N12-2378	1	IVb	2012-12-4	Switzerland	-
N13-0987	1	IVb	2013-6-26	Switzerland	-
NRRL B-33095	1	IVb	-	-	-
NRRL B-33140	1	IVb	-	-	-
NRRL B-33615	1	IVb	2003-4-10	USA	NJ
OLM 10	1	IVb	1933	USA	Massachusetts
p957-8	1	IVb	2011-2-26	Canada	Quebec
PNUSAL000443	1	IVb	2012-12-11	USA	-
PNUSAL000446	1	IVb	2013-11-8	USA	-
PNUSAL003060	1	IVb	-	USA	-
PNUSAL001177	1	IVb	Nov 2014	USA	-
PNUSAL001180	1	IVb	-	USA	-
PNUSAL001182	1	IVb	Nov 2014	USA	-
PNUSAL001188	1	IVb	-	USA	-
PNUSAL001981	1	IVb	-	USA	-
PNUSAL003835	1	IVb	Feb 2018	USA	-
PNUSAL003989	1	IVb	-	USA	-
PNUSAL004002	1	IVb	-	USA	-
PNUSAL004007	1	IVb	-	USA	-
PNUSAL004009	1	IVb	-	USA	-
PNUSAL004010	1	IVb	-	USA	-
PNUSAL004012	1	IVb	-	USA	-
PNUSAL004014	1	IVb	-	USA	-
PNUSAL004023	1	IVb	-	USA	-
PNUSAL004037	1	IVb	-	USA	-
PNUSAL004054	1	IVb	-	USA	-
PNUSAL004059	1	IVb	-	USA	-
PNUSAL004069	1	IVb	-	USA	-
PNUSAL004075	1	IVb	-	USA	-
PNUSAL004088	1	IVb	-	USA	-
PNUSAL004090	1	IVb	-	USA	-
PNUSAL004112	1	IVb	-	USA	-
PNUSAL004117	1	IVb	-	USA	-
PNUSAL004128	1	IVb	-	USA	-
PNUSAL004140	1	IVb	-	USA	-
PNUSAL004145	1	IVb	-	USA	-
PNUSAL004162	1	IVb	-	USA	-
PNUSAL004164	1	IVb	-	USA	-
PNUSAL004169	1	IVb	-	USA	-
PNUSAL004171	1	IVb	-	USA	-
PNUSAL004182	1	IVb	-	USA	-
PNUSAL004183	1	IVb	2018-7-26	USA	-
PNUSAL004184	1	IVb	2018-7-26	USA	-
PNUSAL004193	1	IVb	2018-7-24	USA	-
PNUSAL004194	1	IVb	2018-7-24	USA	-
PNUSAL004209	1	IVb	-	USA	-
PNUSAL004224	1	IVb	-	USA	-
PNUSAL004225	1	IVb	-	USA	-
PNUSAL004226	1	IVb	-	USA	-
PNUSAL004227	1	IVb	-	USA	-
PNUSAL004238	1	IVb	-	USA	-
PNUSAL004242	1	IVb	-	USA	-
PNUSAL004243	1	IVb	-	USA	-
PNUSAL004245	1	IVb	-	USA	-
PNUSAL004250	1	IVb	-	USA	-
PNUSAL004254	1	IVb	-	USA	-
PNUSAL004259	1	IVb	-	USA	-
PNUSAL004260	1	IVb	-	USA	-
PNUSAL004262	1	IVb	-	USA	-
PNUSAL004265	1	IVb	-	USA	-
PNUSAL004267	1	IVb	-	USA	-
PNUSAL004432	1	IVb	-	USA	-
PNUSAL004451	1	IVb	-	USA	-
PNUSAL004466	1	IVb	-	USA	-
18B08020-2	1	IVb	2018-8-6	USA	NY
81-0592	1	IVb	1981-7-1	Canada	Halifax
FUJG00000000	1	IVb	-	-	-
4b F2365	1	IVb	-	-	-
FDA451362 C1 3-O	1	IVb	2009-5-26	USA	MI
CDPHFDLB-F09M01172	1	IVb	Sep 2009	USA	CA
LM05-00008	1	IVb	-	-	-
FDA593556 37-6	1	IVb	2010-5-10	USA	WA
CFSAN044773	1	IVb	2003	Italy	-
2842STDY5753937	1	IVb	2006	Netherlands	-
2015TE27043	1	IVb	2015-9-23	Italy	Marche, Pesaro- Urbino, Pesaro
FDA631776 54-1	1	IVb	2011-2-11	USA	WA
104	1	IVb	2015	Poland	-
FWEJ00000000	1	IVb	-	-	-
PNUSAL004480	1	IVb	-	USA	-
02-1103	1	IVb	2002	Canada	British Columbia
PNUSAL004489	1	IVb	-	USA	-
FDA1077604-C001-001	1	IVb	2018-8-3	Venezuela	-
18B08050I-5	1	IVb	2018-8-6	USA	NY
10-0809	1	IVb	1981	Canada	Nova Scotia
02-1289	1	IVb	2002	Canada	British Columbia
PNUSAL004492	1	IVb	-	USA	-
LT985474	1	IVb	-	-	-
L44	1	IVb	2020	Switzerland	Zurich
TS26/L4742/DD6303	1	IVb	1981	-	-
604	1	IVb	2016	Poland	-
887	1	IVb	2017	Poland	-
LM-F-140	1	IVb	2013	Canada	Toronto
2993	1	IVb	2014	Australia	-
BCW_2356	1	IVb	-	-	-
CFSAN002245	1	IVb	2012-6-19	USA	-
CFSAN045863	1	IVb	Aug 2014	Italy	-
CFSAN060199	1	IVb	2014	USA	WA
FDA00008711	1	IVb	2015-1-6	USA	MO
FLAG-41283-A	1	IVb	2018-6-5	USA	FL
FDA955568-C001-001	1	IVb	2017-4-13	USA	NY
2015TE17781-4	1	IVb	2015-5-5	Italy	Marche, Pesaro- Urbino, Isola del piano
TS27/L4738/DD6304	1	IVb	1981	-	-
234	1	IVb	2015	Poland	-
CFSAN045869	1	IVb	2003	Italy	-
FDA849577	1	IVb	2014-4-23	USA	MA
PNUSAL000318	1	IVb	-	USA	-
FDA299415-2	1	IVb	2004-9-4	Mexico	-
LMJF5203	1	IVb	2007-1-1	Switzerland	-
FSLC1-122	1	IVb	1998	USA	NY
IN-TR-1-BL1	1	IVb	2018-5-28	USA	IN
FRRB2727	1	IVb	1988	Australia	-
NRRL B-33047	1	IVb	1981	Canada	-
I1803917	1	IVb	2018-7-23	USA	WV
J1-108	1	IVb	1981	Canada	-
MOD1_LS271	1	IVb	1994-7-22	USA	TX
LM12_3	1	IVb	2012-7-3	China	Shanghai
lmonocytogenes	1	IVb	2020-09-20	China	Hangzhou
LS411	1	IVb	1985	USA	-
MBT-6	1	IVb	2015-6-22	Germany	Kiel
MQ130026	1	IVb	2013	Ireland	-
NTSN	1	IVb	2011	China	Jiangsu
PNUSAL000474	1	IVb	2013-11-29	USA	-
NIHS-28	1	IVb	-	-	-
PNUSAL001142	1	IVb	Oct 2014	USA	-
SCPM-O-B-8699	1	IVb	2017-10-3	Russia	Moscow region
SKB3296	1	IVb	2013-6-8	USA	North Carolina
PNUSAL001157	1	IVb	Oct 2014	USA	-
PNUSAL000550	1	IVb	2013-12-30	USA	-
